# Supplementary material for: From Nature to Innovation: The Uncharted Potential of Natural Deep Eutectic Solvents
Source: MDPI journal article supplement (doi:10.3390/molecules28227653), 2023-11-18
Supplement: s1 [file s1]

**Tables S1a and S1b** are for articles published in journals with the highest impact factors (for Web of Science) and the highest CiteScore (for Scopus).

### **S1a. Most Relevant Journals (Web of Science)**

| <b>Authors</b>                                                                                           | <b>Article Name</b>                                                                                                                                                                                             | <b>Journal</b>                      | <b>2022 JIF</b> |
|----------------------------------------------------------------------------------------------------------|-----------------------------------------------------------------------------------------------------------------------------------------------------------------------------------------------------------------|-------------------------------------|-----------------|
| Satlewal, A; Agrawal, R; Bhagia, S; Sangoro, J; Ragauskas, AJ                                            | Natural deep eutectic solvents for lignocellulosic biomass pretreatment: Recent developments, challenges and novel opportunities                                                                                | BIOTECHNOLOGY ADVANCES              | 16              |
| El Achkar, T; Greige-Gerges, H; Fourmentin, S                                                            | Basics and properties of deep eutectic solvents: a review                                                                                                                                                       | ENVIRONMENTAL CHEMISTRY LETTERS     | 15.7            |
| Benvenutti, L; Zielinski, AAF; Ferreira, SRS                                                             | Which is the best food emerging solvent: IL, DES or NADES?                                                                                                                                                      | TRENDS IN FOOD SCIENCE & TECHNOLOGY | 15.3            |
| Tian, Y; Zhu, ZW; Sun, DW                                                                                | Naturally sourced biosubstances for regulating freezing points in food researches: Fundamentals, current applications and future trends                                                                         | TRENDS IN FOOD SCIENCE & TECHNOLOGY | 15.3            |
| Yu, JH; Liu, XW; Zhang, LF; Shao, P; Wu, WN; Chen, ZR; Li, JD; Renard, CMGC                              | An overview of carotenoid extractions using green solvents assisted by Z-isomerization                                                                                                                          | TRENDS IN FOOD SCIENCE & TECHNOLOGY | 15.3            |
| Cui, HP; Yu, JH; Zhai, Y; Feng, LH; Chen, PS; Hayat, K; Xu, Y; Zhang, XM; Ho, CT                         | Formation and fate of Amadori rearrangement products in Maillard reaction                                                                                                                                       | TRENDS IN FOOD SCIENCE & TECHNOLOGY | 15.3            |
| Gullon, P; Gullon, B; Romani, A; Rocchetti, G; Lorenzo, JM                                               | Smart advanced solvents for bioactive compounds recovery from agri-food by-products: A review                                                                                                                   | TRENDS IN FOOD SCIENCE & TECHNOLOGY | 15.3            |
| Liu, XP; Zhai, YB; Xu, ZX; Zhu, Y; Zhou, Y; Wang, ZX; Liu, LM; Liang, FS; Ren, WY; Xie, Y; Li, CT; Xu, M | One-pot production of 5-methylfurfural (5-MF) and enhanced dewaterability of waste activated sludge by hydrothermal treatment with natural deep eutectic solvents (NADES): Experimental and theoretical studies | CHEMICAL ENGINEERING JOURNAL        | 15.1            |

|                                                                                                 |                                                                                                                                                                                   |                                                             |      |
|-------------------------------------------------------------------------------------------------|-----------------------------------------------------------------------------------------------------------------------------------------------------------------------------------|-------------------------------------------------------------|------|
| Cai, ZH; Wang, JD; Liu, L; Ruan, LD;<br>Gu, Q; Yan, XY; Fu, LN; Zhao, PQ;<br>Zhang, S; Fu, YJ   | A green and designable natural deep eutectic solvent-based<br>supramolecular solvents system: Efficient extraction and enrichment<br>for phytochemicals                           | CHEMICAL ENGINEERING<br>JOURNAL                             | 15.1 |
| Moradi, G; Rahimi, M; Zinadini, S;<br>Shamsipur, M; Babajani, N                                 | Natural deep eutectic solvent modified nanofiltration membranes with<br>superior antifouling properties for pharmaceutical wastewater<br>treatment                                | CHEMICAL ENGINEERING<br>JOURNAL                             | 15.1 |
| Zhang, P; Xiong, WJ; Shi, MZ; Tu, ZH;<br>Hu, XB; Zhang, XM; Wu, YT                              | Natural deep eutectic solvent-based gels with multi-site interaction<br>mechanism for selective membrane separation of SO <sub>2</sub> from N <sub>2</sub> and<br>CO <sub>2</sub> | CHEMICAL ENGINEERING<br>JOURNAL                             | 15.1 |
| Xu, L; Sun, DW; Tian, Y; Fan, TH;<br>Zhu, ZW                                                    | Nanocomposite hydrogel for daytime passive cooling enabled by<br>combined effects of radiative and evaporative cooling                                                            | CHEMICAL ENGINEERING<br>JOURNAL                             | 15.1 |
| Du, X; Wang, B; Li, HJ; Liu, HT; Shi,<br>S; Feng, J; Pan, N; Xia, XF                            | Research progress on quality deterioration mechanism and control<br>technology of frozen muscle foods                                                                             | COMPREHENSIVE REVIEWS IN<br>FOOD SCIENCE AND FOOD<br>SAFETY | 14.8 |
| Candia-Lomeli, M; Covarrubias-<br>Garcia, I; Aizpuru, A; Arriaga, S                             | Preparation and physicochemical characterization of deep eutectic<br>solvents and ionic liquids for the potential absorption and<br>biodegradation of styrene vapors              | JOURNAL OF HAZARDOUS<br>MATERIALS                           | 13.6 |
| Espino, M; Fernandez, MD; Gomez,<br>FJV; Silva, MF                                              | Natural designer solvents for greening analytical chemistry                                                                                                                       | TRAC-TRENDS IN ANALYTICAL<br>CHEMISTRY                      | 13.1 |
| Cunha, SC; Fernandes, JO                                                                        | Extraction techniques with deep eutectic solvents                                                                                                                                 | TRAC-TRENDS IN ANALYTICAL<br>CHEMISTRY                      | 13.1 |
| Della Posta, S; Gallo, V; Gentili, A;<br>Fanali, C                                              | Strategies for the recovery of bioactive molecules from deep eutectic<br>solvents extracts                                                                                        | TRAC-TRENDS IN ANALYTICAL<br>CHEMISTRY                      | 13.1 |
| Wang, YL; Zhang, YB; Lin, ZS;<br>Huang, T; Li, W; Gong, WX; Guo, YH;<br>Su, JM; Wang, JY; Tu, Q | A green method of preparing a natural and degradable wound<br>dressing containing aloe vera as an active ingredient                                                               | COMPOSITES PART B-<br>ENGINEERING                           | 13.1 |
| Lavilla, I; Romero, V; Costas, I;<br>Bendicho, C                                                | Greener derivatization in analytical chemistry                                                                                                                                    | TRAC-TRENDS IN ANALYTICAL<br>CHEMISTRY                      | 13.1 |

|                                        |                                                                                                                                                   |                                     |      |
|----------------------------------------|---------------------------------------------------------------------------------------------------------------------------------------------------|-------------------------------------|------|
| Hashemi, B; Zohrabi, P; Dehdashtian, S | Application of green solvents as sorbent modifiers in sorptive-based extraction techniques for extraction of environmental pollutants             | TRAC-TRENDS IN ANALYTICAL CHEMISTRY | 13.1 |
| Hasani, M; Kalhor, HR                  | Enzyme-Inspired Lysine-Modified Carbon Quantum Dots Performing Carbonylation Using Urea and a Cascade Reaction for Synthesizing 2-Benzoxazolinone | ACS CATALYSIS                       | 12.9 |

### S1b. Most Relevant Journals (Scopus)

| Scopus                                                                                            |                                                                                                                                                                                                                 |                                                |         |
|---------------------------------------------------------------------------------------------------|-----------------------------------------------------------------------------------------------------------------------------------------------------------------------------------------------------------------|------------------------------------------------|---------|
| Authors                                                                                           | Article Name                                                                                                                                                                                                    | Journal                                        | 2022 CS |
| Cunha S.C., Fernandes J.O.,                                                                       | Extraction techniques with deep eutectic solvents                                                                                                                                                               | TrAC - Trends in Analytical Chemistry          | 25.8    |
| Espino M., de los Ángeles Fernández M., Gomez F.J.V., Silva M.F.,                                 | Natural designer solvents for greening analytical chemistry                                                                                                                                                     | TrAC - Trends in Analytical Chemistry          | 25.8    |
| Tian Y., Zhu Z., Sun D.-W.,                                                                       | Naturally sourced biosubstances for regulating freezing points in food researches: Fundamentals, current applications and future trends                                                                         | Trends in Food Science and Technology          | 25.2    |
| Benvenuto L., Zielinski A.A.F., Ferreira S.R.S.,                                                  | Which is the best food emerging solvent: IL, DES or NADES?                                                                                                                                                      | Trends in Food Science and Technology          | 25.2    |
| Mišan A., Nađpal J., Stupar A., Pojić M., Mandić A., Verpoorte R., Choi Y.H.,                     | The perspectives of natural deep eutectic solvents in agri-food sector                                                                                                                                          | Critical Reviews in Food Science and Nutrition | 23.6    |
| Liu X., Zhai Y., Xu Z., Zhu Y., Zhou Y., Wang Z., Liu L., Liang F., Ren W., Xie Y., Li C., Xu M., | One-pot production of 5-methylfurfural (5-MF) and enhanced dewaterability of waste activated sludge by hydrothermal treatment with natural deep eutectic solvents (NADES): Experimental and theoretical studies | Chemical Engineering Journal                   | 21.5    |

|                                                                                                                                                      |                                                                                                                                                                                      |                                |      |
|------------------------------------------------------------------------------------------------------------------------------------------------------|--------------------------------------------------------------------------------------------------------------------------------------------------------------------------------------|--------------------------------|------|
| Cai Z.-H., Wang J.-D., Liu L., Ruan L.-D.,<br>Gu Q., Yan X.-Y., Fu L.-N., Zhao P.-Q.,<br>Zhang S., Fu Y.-J.,                                         | A green and designable natural deep eutectic solvent-<br>based supramolecular solvents system: Efficient<br>extraction and enrichment for phytochemicals                             | Chemical Engineering Journal   | 21.5 |
| Hasani M., Kalhor H.R.,                                                                                                                              | Enzyme-Inspired Lysine-Modified Carbon Quantum<br>Dots Performing Carbonylation Using Urea and a<br>Cascade Reaction for Synthesizing 2-Benzoxazolinone                              | ACS Catalysis                  | 20.6 |
| Candia-Lomelí M., Covarrubias-Garcia<br>I., Aizpuru A., Arriaga S.,                                                                                  | Preparation and physicochemical characterization of<br>deep eutectic solvents and ionic liquids for the potential<br>absorption and biodegradation of styrene vapors                 | Journal of Hazardous Materials | 20.2 |
| Nava-Ocampo M.F., Fuhaid L.A.,<br>Verpoorte R., Choi Y.H., van Loosdrecht<br>M.C.M., Vrouwenvelder J.S., Witkamp<br>G.J., Farinha A.S.F., Bucs S.S., | Natural deep eutectic solvents as biofilm structural<br>breakers                                                                                                                     | Water Research                 | 19.8 |
| Zhong C., Luo S., Ye J., Liu C.,                                                                                                                     | Shape and size-controlled starch nanoparticles<br>prepared by self-assembly in natural deep eutectic<br>solvents: Effect and mechanism                                               | Food Hydrocolloids             | 19.3 |
| Fang X., Li Y., Kua Y.L., Chew Z.L., Gan<br>S., Tan K.W., Lee T.Z.E., Cheng W.K.,<br>Lau H.L.N.,                                                     | Insights on the potential of natural deep eutectic<br>solvents (NADES) to fine-tune durian seed gum for use<br>as edible food coating                                                | Food Hydrocolloids             | 19.3 |
| Grala D., Biernacki K., Freire C.,<br>Kuźniarska-Biernacka I., Souza H.K.S.,<br>Gonçalves M.P.,                                                      | Effect of natural deep eutectic solvent and chitosan<br>nanoparticles on physicochemical properties of locust<br>bean gum films                                                      | Food Hydrocolloids             | 19.3 |
| Zheng W.-Y., Wu X.-M., Li M.-X., Qiu S.-<br>L., Yang T.-D., Yang R., Chen Z.-P.,<br>Wang S.-Y., Liao L.,                                             | Synergistic strongly coupled super-deamidation of<br>wheat gluten by glucose-organic acid natural deep<br>eutectic solvent and the efficaciousness of structure and<br>functionality | Food Hydrocolloids             | 19.3 |
| Chen M., Lahaye M.,                                                                                                                                  | Natural deep eutectic solvents pretreatment as an aid<br>for pectin extraction from apple pomace                                                                                     | Food Hydrocolloids             | 19.3 |
| van der Sman R.G.M., van den Hoek<br>I.A.F., Renzetti S.,                                                                                            | Sugar replacement with zwitterionic plasticizers like<br>amino acids                                                                                                                 | Food Hydrocolloids             | 19.3 |

|                                                                            |                                                                                                                                                                     |                       |      |
|----------------------------------------------------------------------------|---------------------------------------------------------------------------------------------------------------------------------------------------------------------|-----------------------|------|
| Gouveia T.I.A., Biernacki K., Castro M.C.R., Gonçalves M.P., Souza H.K.S., | A new approach to develop biodegradable films based on thermoplastic pectin                                                                                         | Food Hydrocolloids    | 19.3 |
| Liu C., Li Z., Li M.-C., Chen W., Xu W., Hong S., Wu Q., Mei C.,           | Lignin-containing cellulose nanofibers made with microwave-aid green solvent treatment for magnetic fluid stabilization                                             | Carbohydrate Polymers | 18.9 |
| Chen M., Falourd X., Lahaye M.,                                            | Sequential natural deep eutectic solvent pretreatments of apple pomace: A novel way to promote water extraction of pectin and to tailor its main structural domains | Carbohydrate Polymers | 18.9 |
| Douard L., Bras J., Encinas T., Belgacem M.N.,                             | Natural acidic deep eutectic solvent to obtain cellulose nanocrystals using the design of experience approach                                                       | Carbohydrate Polymers | 18.9 |
| Selvanathan V., Azzahari A.D., Abd. Halim A.A., Yahya R.,                  | Ternary natural deep eutectic solvent (NADES) infused phthaloyl starch as cost efficient quasi-solid gel polymer electrolyte                                        | Carbohydrate Polymers | 18.9 |

Table S2. The Top 20 Publishers

| S2. The Top 20 Publishers              |       |           |                                        |       |           |
|----------------------------------------|-------|-----------|----------------------------------------|-------|-----------|
| WoS                                    |       |           | Scopus                                 |       |           |
| Publication Titles                     | Total | % of 1036 | Publication Titles                     | Total | % of 1055 |
| JOURNAL OF MOLECULAR LIQUIDS           | 73    | 7,05%     | JOURNAL OF MOLECULAR LIQUIDS           | 78    | 7.39%     |
| MOLECULES                              | 54    | 5,21%     | MOLECULES                              | 54    | 5.12%     |
| FOOD CHEMISTRY                         | 35    | 3,38%     | FOOD CHEMISTRY                         | 37    | 3.51%     |
| ACS SUSTAINABLE CHEMISTRY ENGINEERING  | 34    | 3,28%     | ACS SUSTAINABLE CHEMISTRY ENGINEERING  | 33    | 3.13%     |
| SEPARATION AND PURIFICATION TECHNOLOGY | 19    | 1,83%     | INDUSTRIAL CROPS AND PRODUCTS          | 21    | 1.99%     |
| ANTIOXIDANTS                           | 18    | 1,74%     | SEPARATION AND PURIFICATION TECHNOLOGY | 20    | 1.90%     |
| JOURNAL OF CHROMATOGRAPHY A            | 17    | 1,64%     | MICROCHEMICAL JOURNAL                  | 18    | 1.71%     |
| INDUSTRIAL CROPS AND PRODUCTS          | 16    | 1,54%     | ANTIOXIDANTS                           | 17    | 1.61%     |

|                                                       |    |       |                                                       |    |       |
|-------------------------------------------------------|----|-------|-------------------------------------------------------|----|-------|
| MICROCHEMICAL JOURNAL                                 | 16 | 1,54% | JOURNAL OF CHROMATOGRAPHY A                           | 17 | 1.61% |
| RSC ADVANCES                                          | 16 | 1,54% | RSC ADVANCES                                          | 16 | 1.52% |
| GREEN CHEMISTRY                                       | 15 | 1,45% | SUSTAINABLE CHEMISTRY AND PHARMACY                    | 16 | 1.52% |
| PLANTA MEDICA                                         | 14 | 1,35% | GREEN CHEMISTRY                                       | 15 | 1.42% |
| PLANTS BASEL                                          | 14 | 1,35% | PLANTS                                                | 14 | 1.33% |
| ADVANCES IN BOTANICAL RESEARCH                        | 13 | 1,25% | ADVANCES IN BOTANICAL RESEARCH                        | 13 | 1.23% |
| EUTECTIC SOLVENTS AND STRESS IN PLANTS                | 13 | 1,25% | FOODS                                                 | 12 | 1.14% |
| SUSTAINABLE CHEMISTRY AND PHARMACY                    | 13 | 1,25% | INTERNATIONAL JOURNAL OF BIOLOGICAL<br>MACROMOLECULES | 12 | 1.14% |
| FOODS                                                 | 12 | 1,16% | JOURNAL OF AGRICULTURAL AND FOOD<br>CHEMISTRY         | 10 | 0.95% |
| INTERNATIONAL JOURNAL OF BIOLOGICAL<br>MACROMOLECULES | 11 | 1,06% | LWT                                                   | 10 | 0.95% |
| JOURNAL OF AGRICULTURAL AND FOOD<br>CHEMISTRY         | 11 | 1,06% | TALANTA                                               | 10 | 0.95% |
| TALANTA                                               | 10 | 0,97% | CARBOHYDRATE POLYMERS                                 | 9  | 0.85% |

OBS.: The review conducted by the TEMAC method continues to evaluate the journals that publish the most on the subject, this can guide the path of the researcher when directing his article to be published in the journals that are already publishing on and to know more deeply about the topic addressed.

**Table S3.** The Top 20 Authors

| S3. The Top 20 Authors |       |           |             |       |           |
|------------------------|-------|-----------|-------------|-------|-----------|
| WoS                    |       |           | Scopus      |       |           |
| Author Name            | Total | % of 1036 | Author Name | Total | % of 1055 |
| Duarte ARC             | 27    | 2,61%     | Duarte ARC  | 27    | 2.56%     |
| Paiva A                | 25    | 2,41%     | Verpoorte R | 27    | 2.56%     |
| Silva MF               | 25    | 2,41%     | Silva MF    | 25    | 2.37%     |
| Verpoorte R            | 25    | 2,41%     | Choi YH     | 24    | 2.27%     |
| Choi YH                | 24    | 2,32%     | Paiva A     | 24    | 2.27%     |
| Khan MA                | 24    | 2,32%     | Atilhan M   | 19    | 1.80%     |

|                      |    |       |                         |    |       |
|----------------------|----|-------|-------------------------|----|-------|
| Gomez FJV            | 18 | 1,74% | Gomez FJV               | 19 | 1.80% |
| Atilhan M            | 17 | 1,64% | Aparicio S              | 15 | 1.42% |
| Redovnikovic IR      | 17 | 1,64% | Reis RL                 | 14 | 1.33% |
| Aparicio S           | 16 | 1,54% | Espino M                | 13 | 1.23% |
| Espino M             | 13 | 1,25% | Radojčić Redovniković I | 13 | 1.23% |
| Panic M              | 13 | 1,25% | Dai Y                   | 11 | 1.04% |
| Fernandez MD         | 12 | 1,16% | Panić M                 | 11 | 1.04% |
| Mun'im A             | 12 | 1,16% | Tiecco M                | 11 | 1.04% |
| Bubalo MC            | 11 | 1,06% | Boudesocque-Delaye L    | 10 | 0.95% |
| Grasemann H          | 11 | 1,06% | Witkamp GJ              | 10 | 0.95% |
| Reis RL              | 11 | 1,06% | Altunay N               | 9  | 0.85% |
| Tiecco M             | 11 | 1,06% | Craveiro R              | 9  | 0.85% |
| Boudesocque-delaye L | 10 | 0,97% | Cvjetko Bubalo M        | 9  | 0.85% |
| Dai YT               | 10 | 0,97% | Mun'im A                | 9  | 0.85% |
| Douda DN             | 10 | 0,97% | Wils L                  | 9  | 0.85% |
| Liu Y                | 10 | 0,97% | Zhao L                  | 9  | 0.85% |
| Liu YF               | 10 | 0,97% | Ahmad I                 | 8  | 0.76% |
| Witkamp GJ           | 10 | 0,97% | Boczka G                | 8  | 0.76% |
| Zhao LS              | 10 | 0,97% | Bravi M                 | 8  | 0.76% |

OBS.: Knowing the authors who publish the most on the subject and the articles they are publishing is another analysis conducted by TEMAC. The pattern of positions remains constant in all analyzes carried out by both Web of Science and Scopus.

**Table S4.** The Top 20 Cited Authors

| S4. The Top 20 Cited Authors |             |             |             |
|------------------------------|-------------|-------------|-------------|
| WoS                          |             | Scopus      |             |
| Author Name                  | Cited Times | Author Name | Cited Times |
| Choi YH                      | 4151        | Verpoorte R | 4680        |
| Verpoorte R                  | 4138        | Choi YH     | 4678        |
| Dai Y                        | 3798        | Dai Y       | 4280        |

|                            |      |                         |      |
|----------------------------|------|-------------------------|------|
| Witkamp GJ                 | 3159 | Witkamp G-J             | 3500 |
| vanSpronsen J              | 2318 | vanSpronsen J           | 2566 |
| Duarte ARC                 | 2284 | Paiva A                 | 2172 |
| Paiva A                    | 1797 | Duarte ARC              | 2146 |
| Reis RL                    | 1773 | Reis RL                 | 2111 |
| Craveiro R                 | 1696 | Craveiro R              | 1819 |
| Martins M                  | 1429 | Aroso I                 | 1657 |
| Aroso I                    | 1322 | Martins M               | 1455 |
| Khan MA                    | 1295 | Radojčić Redovniković I | 966  |
| Grasemann H                | 1200 | Hollmann F              | 869  |
| Radojčić Redovniković I    | 868  | Silva MF                | 866  |
| Hollmann F                 | 790  | Liu Y                   | 858  |
| Espino M                   | 768  | Espino M                | 799  |
| Arends IWCE                | 701  | Gomez FJV               | 785  |
| Verberne M                 | 680  | Verberne M              | 772  |
| Silva MF                   | 680  | Arends IWCE             | 772  |
| de los Angeles Fernandez M | 641  | Cvjetko Bubalo M        | 717  |

OBS.: Knowing which authors are most cited differs from those who publish the most. Citation analysis is done using all the results of the articles obtained, individualizing each of the authors, and adding the history of total citations received for them contained in the database platforms.

**Table S5.** Evolution of the Theme

| S5. Evolution of the Theme |                    |        |                    |
|----------------------------|--------------------|--------|--------------------|
| WoS                        |                    | Scopus |                    |
| Year                       | Number of Articles | Year   | Number of Articles |
| 2022                       | 265                | 2022   | 286                |
| 2021                       | 208                | 2021   | 196                |
| 2020                       | 146                | 2023   | 169                |
| 2019                       | 111                | 2020   | 150                |



|      |     |      |     |
|------|-----|------|-----|
| 2023 | 110 | 2019 | 100 |
| 2018 | 83  | 2018 | 77  |
| 2017 | 32  | 2017 | 28  |
| 2016 | 29  | 2016 | 24  |
| 2014 | 16  | 2015 | 10  |
| 2015 | 16  | 2014 | 7   |
| 2011 | 8   | 2013 | 4   |
| 2013 | 8   | 2012 | 0   |
| 2012 | 4   | 2011 | 4   |

OBS.: Monitoring the evolution of articles published on the subject year-by-year is important to pay attention to the research being conducted in the area and whether the research is stagnant or has the potential to cover the area.

**Tables S6a and S6b** Most Cited Documents

### **S6a - Most Cited Documents (Web of Science)**

WoS

| <b>Authors</b>                                                                                                                                        | <b>Document Title</b>                                                                                    | <b>Total Citations</b> |
|-------------------------------------------------------------------------------------------------------------------------------------------------------|----------------------------------------------------------------------------------------------------------|------------------------|
| Dai, Yuntao; van Spronsen, Jaap; Witkamp, Geert-Jan; Verpoorte, Robert; Choi, Young Hae                                                               | Natural deep eutectic solvents as new potential media for green technology                               | 1401                   |
| Paiva, Alexandre; Craveiro, Rita; Aroso, Ivo; Martins, Marta; Reis, Rui L.; Duarte, Ana Rita C.                                                       | Natural Deep Eutectic Solvents - Solvents for the 21st Century                                           | 1296                   |
| Choi, Young Hae; van Spronsen, Jaap; Dai, Yuntao; Verberne, Marianne; Hollmann, Frank; Arends, Isabel W. C. E.; Witkamp, Geert-Jan; Verpoorte, Robert | Are Natural Deep Eutectic Solvents the Missing Link in Understanding Cellular Metabolism and Physiology? | 680                    |
| Dai, Yuntao; Witkamp, Geert-Jan; Verpoorte, Robert; Choi, Young Hae                                                                                   | Tailoring properties of natural deep eutectic solvents with water to facilitate their applications       | 622                    |

---

|                                                                                                                                                           |                                                                                                                                     |     |
|-----------------------------------------------------------------------------------------------------------------------------------------------------------|-------------------------------------------------------------------------------------------------------------------------------------|-----|
| Liu, Yang; Friesen, J. Brent; McAlpine, James B.; Lankin, David C.;<br>Chen, Shao-Nong; Pauli, Guido F.                                                   | Natural Deep Eutectic Solvents: Properties, Applications, and Perspectives                                                          | 507 |
| Dai, Yuntao; Witkamp, Geert-Jan; Verpoorte, Robert; Choi, Young<br>Hae                                                                                    | Natural Deep Eutectic Solvents as a New Extraction Media for Phenolic<br>Metabolites in <i>Carthamus tinctorius</i> L.              | 427 |
| Ruesgas-Ramon, Mariana; Figueroa-Espinoza, Maria Cruz;<br>Durand, Erwann                                                                                  | Application of Deep Eutectic Solvents (DES) for Phenolic Compounds<br>Extraction: Overview, Challenges, and Opportunities           | 368 |
| Cunha, Sara C.; Fernandes, Jose O.                                                                                                                        | Extraction techniques with deep eutectic solvents                                                                                   | 343 |
| van Osch, Dannie J. G. P.; Dietz, Carin H. J. T.; van Spronsen, Jaap;<br>Kroon, Maaike C.; Gallucci, Fausto; Annaland, Martin van Sint;<br>Tuinier, Remco | A Search for Natural Hydrophobic Deep Eutectic Solvents Based on<br>Natural Components                                              | 238 |
| Espino, Magdalena; de los Angeles Fernandez, Maria; Gomez,<br>Federico J. V.; Fernanda Silva, Maria                                                       | Natural designer solvents for greening analytical chemistry                                                                         | 226 |
| Dai, Yuntao; Verpoorte, Robert; Choi, Young Hae                                                                                                           | Natural deep eutectic solvents providing enhanced stability of natural<br>colorants from safflower ( <i>Carthamus tinctorius</i> )  | 223 |
| Satlewal, Alok; Agrawal, Ruchi; Bhagia, Samarthya; Sangoro,<br>Joshua; Ragauskas, Arthur J.                                                               | Natural deep eutectic solvents for lignocellulosic biomass pretreatment:<br>Recent developments, challenges and novel opportunities | 218 |

---

---

|                                                                                                                                                                   |                                                                                                                                                                                                |     |
|-------------------------------------------------------------------------------------------------------------------------------------------------------------------|------------------------------------------------------------------------------------------------------------------------------------------------------------------------------------------------|-----|
| Dai, Yuntao; Rozema, Evelien; Verpoorte, Robert; Choi, Young Hae                                                                                                  | Application of natural deep eutectic solvents to the extraction of anthocyanins from <i>Catharanthus roseus</i> with high extractability and stability replacing conventional organic solvents | 215 |
| Craveiro, R.; Aroso, I.; Flammia, V.; Carvalho, T.; Viciosa, M. T.; Dionisio, M.; Barreiros, S.; Reis, R. L.; Duarte, A. R. C.; Paiva, A.                         | Properties and thermal behavior of natural deep eutectic solvents                                                                                                                              | 208 |
| Huang, Yao; Feng, Fang; Jiang, Jie; Qiao, Ying; Wu, Tao; Voglmeir, Josef; Chen, Zhi-Gang                                                                          | Green and efficient extraction of rutin from tartary buckwheat hull by using natural deep eutectic solvents                                                                                    | 204 |
| Vanda, Henni; Dai, Yuntao; Wilson, Erica G.; Verpoorte, Robert; Choi, Young Hae                                                                                   | Green solvents from ionic liquids and deep eutectic solvents to natural deep eutectic solvents                                                                                                 | 199 |
| Bubalo, Marina Cvjetko; Vidovic, Senka; Redovnikovic, Ivana Radojic; Jokic, Stela                                                                                 | New perspective in extraction of plant biologically active compounds by green solvents                                                                                                         | 198 |
| Radosevic, Kristina; Curko, Natka; Srcek, Visnja Gaurina; Bubalo, Marina Cvjetko; Tomasevic, Marina; Ganic, Karin Kovacevic; Redovnikovic, Ivana Radojic          | Natural deep eutectic solvents as beneficial extractants for enhancement of plant extracts bioactivity                                                                                         | 195 |
| Chemat, Farid; Vian, Maryline Abert; Ravi, Harish Karthikeyan; Khadhraoui, Boutheina; Hilali, Soukaina; Perino, Sandrine; Tixier, Anne-Sylvie Fabiano             | Review of Alternative Solvents for Green Extraction of Food and Natural Products: Panorama, Principles, Applications and Prospects                                                             | 182 |
| Bosiljkov, Tomislau; Dujmic, Filip; Bubalo, Marina Cujetko; Hribar, Janez; Vidrih, Rajko; Brncic, Mladen; Zlatic, Emil; Redovnikavic, Ivana Radojic; Jokic, Stela | Natural deep eutectic solvents and ultrasound-assisted extraction: Green approaches for extraction of wine lees anthocyanins                                                                   | 178 |

---

---

**S6b - Most Cited Documents (Scopus)**


---

| Scopus                                                                                                     |                                                                                                                        |                 |
|------------------------------------------------------------------------------------------------------------|------------------------------------------------------------------------------------------------------------------------|-----------------|
| Authors                                                                                                    | Document Title                                                                                                         | Total Citations |
| Dai Y., van Spronsen J., Witkamp G.-J., Verpoorte R., Choi Y.H.                                            | Natural deep eutectic solvents as new potential media for green technology                                             | 1540            |
| Paiva A., Craveiro R., Aroso I., Martins M., Reis R.L., Duarte A.R.C.                                      | Natural deep eutectic solvents - Solvents for the 21st century                                                         | 1427            |
| Choi Y.H., van Spronsen J., Dai Y., Verberne M., Hollmann F., Arends I.W.C.E., Witkamp G.-J., Verpoorte R. | Are natural deep eutectic solvents the missing link in understanding cellular metabolism and physiology?               | 772             |
| Dai Y., Witkamp G.-J., Verpoorte R., Choi Y.H.                                                             | Tailoring properties of natural deep eutectic solvents with water to facilitate their applications                     | 676             |
| Liu Y., Friesen J.B., McAlpine J.B., Lankin D.C., Chen S.-N., Pauli G.F.                                   | Natural Deep Eutectic Solvents: Properties, Applications, and Perspectives                                             | 549             |
| Dai Y., Witkamp G.-J., Verpoorte R., Choi Y.H.                                                             | Natural deep eutectic solvents as a new extraction media for phenolic metabolites in carthamus tinctorius L.           | 475             |
| Ruesgas-Ramon M., Figueroa-Espinoza M.C., Durand E.                                                        | Application of Deep Eutectic Solvents (DES) for Phenolic Compounds Extraction: Overview, Challenges, and Opportunities | 402             |

---

---

|                                                                                                               |                                                                                                                                                                                                |     |
|---------------------------------------------------------------------------------------------------------------|------------------------------------------------------------------------------------------------------------------------------------------------------------------------------------------------|-----|
| Kumar A.K., Parikh B.S., Pravakar M.                                                                          | Natural deep eutectic solvent mediated pretreatment of rice straw: bioanalytical characterization of lignin extract and enzymatic hydrolysis of pretreated biomass residue                     | 384 |
| Cunha S.C., Fernandes J.O.                                                                                    | Extraction techniques with deep eutectic solvents                                                                                                                                              | 374 |
| Satlewal A., Agrawal R., Bhagia S., Sangoro J., Ragauskas A.J.                                                | Natural deep eutectic solvents for lignocellulosic biomass pretreatment: Recent developments, challenges and novel opportunities                                                               | 275 |
| Van Osch D.J.G.P., Dietz C.H.J.T., Van Spronsen J., Kroon M.C., Gallucci F., Van Sint Annaland M., Tuinier R. | A Search for Natural Hydrophobic Deep Eutectic Solvents Based on Natural Components                                                                                                            | 254 |
| Dai Y., Verpoorte R., Choi Y.H.                                                                               | Natural deep eutectic solvents providing enhanced stability of natural colorants from safflower ( <i>Carthamus tinctorius</i> )                                                                | 251 |
| Espino M., de los Angeles Fernandez M., Gomez F.J.V., Silva M.F.                                              | Natural designer solvents for greening analytical chemistry                                                                                                                                    | 249 |
| Dai Y., Rozema E., Verpoorte R., Choi Y.H.                                                                    | Application of natural deep eutectic solvents to the extraction of anthocyanins from <i>Catharanthus roseus</i> with high extractability and stability replacing conventional organic solvents | 248 |

---

|                                                                                                                                |                                                                                                             |     |
|--------------------------------------------------------------------------------------------------------------------------------|-------------------------------------------------------------------------------------------------------------|-----|
| Huang Y., Feng F., Jiang J., Qiao Y., Wu T., Voglmeir J.,<br>Chen Z.-G.                                                        | Green and efficient extraction of rutin from tartary buckwheat hull by using natural deep eutectic solvents | 235 |
| Vanda H., Dai Y., Wilson E.G., Verpoorte R., Choi Y.H.                                                                         | Green solvents from ionic liquids and deep eutectic solvents to natural deep eutectic solvents              | 234 |
| Craveiro R., Aroso I., Flammia V., Carvalho T., Viciosa M.T., Dionisio M., Barreiros S., Reis R.L., Duarte A.R.C.,<br>Paiva A. | Properties and thermal behavior of natural deep eutectic solvents                                           | 230 |
| Cvjetko Bubalo M., Vidovic S., Radojcic Redovnikovic I.,<br>Jokic S.                                                           | New perspective in extraction of plant biologically active compounds by green solvents                      | 222 |
| Radosevic K., Curko N., Gaurina Srcek V., Cvjetko Bubalo M., Tomasevic M., Kovacevic Ganic K., Radojcic Redovnikovic I.        | Natural deep eutectic solvents as beneficial extractants for enhancement of plant extracts bioactivity      | 213 |
| Patzold M., Siebenhaller S., Kara S., Liese A., Syldatk C.,<br>Holtmann D.                                                     | Deep Eutectic Solvents as Efficient Solvents in Biocatalysis                                                | 212 |

OBS.: The most cited articles guide us towards what has already been consolidated as a reference on the subject and which cannot be missing from a review.

**Table S7.** Countries that Publish the Most

| S7. Countries that Publish the Most |                    |         |                    |
|-------------------------------------|--------------------|---------|--------------------|
| WoS                                 |                    | Scopus  |                    |
| Country                             | Number of Articles | Country | Number of Articles |
| China                               | 226                | China   | 249                |
| Spain                               | 90                 | Spain   | 94                 |

|                    |    |                    |    |
|--------------------|----|--------------------|----|
| United States      | 81 | Italy              | 85 |
| Italy              | 74 | India              | 71 |
| Canada             | 72 | United States      | 65 |
| India              | 65 | Portugal           | 58 |
| Portugal           | 56 | Indonesia          | 55 |
| Netherlands        | 46 | Iran               | 46 |
| Brazil             | 43 | Netherlands        | 45 |
| France             | 43 | Malaysia           | 41 |
| Iran               | 41 | France             | 40 |
| Indonesia          | 35 | Poland             | 38 |
| Poland             | 34 | Brazil             | 37 |
| Argentina          | 33 | Argentina          | 34 |
| Malaysia           | 32 | Turkey             | 29 |
| Croatia            | 29 | Croatia            | 26 |
| Turkey             | 29 | Saudi Arabia       | 26 |
| Saudi Arabia       | 27 | Russian Federation | 25 |
| Germany            | 26 | Serbia             | 22 |
| Serbia             | 25 | Germany            | 21 |
| Russian Federation | 24 | Greece             | 21 |

OBS.: The countries that publish the most can point out future places for partnerships, or places where the theme is more present, important and addressed.

**Table S8.** Universities that Publish the Most

| S8. Universities that Publish the Most |                    |                     |                    |
|----------------------------------------|--------------------|---------------------|--------------------|
| WoS                                    |                    | Scopus              |                    |
| Affiliation Name                       | Number of Articles | Affiliation Name    | Number of Articles |
| UNIVERSITY OF TORONTO                  | 68                 | LAQV-REQUIMTE       | 32                 |
| HOSPITAL FOR SICK CHILDREN SICKKIDS    | 67                 | Universiteit Leiden | 31                 |

---

|                                                                       |    |                                                                       |    |
|-----------------------------------------------------------------------|----|-----------------------------------------------------------------------|----|
| LEIDEN UNIVERSITY                                                     | 30 | Universitas Indonesia                                                 | 31 |
| LEIDEN UNIVERSITY EXCL LUMC                                           | 29 | Universidad Nacional de Cuyo                                          | 29 |
| UNIVERSITY NACIONAL CUYO MENDOZA                                      | 26 | Institute of Biology Leiden                                           | 28 |
| UNIVERSITY OF INDONESIA                                               | 26 | Instituto de Biología Agrícola de Mendoza                             | 27 |
| UNIVERSITY OF ZAGREB                                                  | 26 | Ministry of Education China                                           | 26 |
| UNIVERSIDADE NOVA DE LISBOA                                           | 25 | Faculdade de Ciências e Tecnologia da Universidade<br>Nova de Lisboa  | 26 |
| CONSEJO NACIONAL DE INVESTIGACIONES CIENTIFICAS Y<br>TECNICAS CONICET | 22 | University of Zagreb                                                  | 23 |
| SOUTH CHINA UNIVERSITY OF TECHNOLOGY                                  | 21 | South China University of Technology                                  | 22 |
| UNIVERSIDAD DE BURGOS                                                 | 17 | Universidade do Minho                                                 | 21 |
| UNIVERSIDADE DO MINHO                                                 | 16 | Universidad de Burgos                                                 | 19 |
| UNIVERSITY OF TURIN                                                   | 16 | University of Zagreb, Faculty of Food Technology<br>and Biotechnology | 18 |
| CONSEJO SUPERIOR DE INVESTIGACIONES CIENTIFICAS CSIC                  | 15 | Consejo Nacional de Investigaciones Científicas y<br>Técnicas         | 17 |
| UNIVERSITY OF NOVI SAD                                                | 15 | Università degli Studi di Torino                                      | 17 |
| UNIVERSITY OF PERUGIA                                                 | 15 | Zhejiang University of Technology                                     | 16 |
| ZHEJIANG UNIVERSITY OF TECHNOLOGY                                     | 15 | Universidade Nova de Lisboa                                           | 16 |
| RUSSIAN ACADEMY OF SCIENCES                                           | 13 | University of Novi Sad                                                | 16 |
| UNIVERSITI MALAYA                                                     | 13 | Università degli Studi di Perugia                                     | 15 |
| CENTRE NATIONAL DE LA RECHERCHE SCIENTIFIQUE CNRS                     | 12 | Consejo Superior de Investigaciones Científicas                       | 14 |
| CONSIGLIO NAZIONALE DELLE RICERCHE CNR                                | 12 | Sapienza Università di Roma                                           | 14 |
| INRAE                                                                 | 12 | Western Michigan University                                           | 13 |

---

OBS.: As well as authors and countries that publish the most, knowing the universities that are publishing the most on the topic addressed is important to redirect new researchers who intend to study the area, as well as those who seek partnerships.



Table S9. Agencies that Most Fund

| S9. Agencies that Most Fund                                        |                    |                                                                                 |                    |
|--------------------------------------------------------------------|--------------------|---------------------------------------------------------------------------------|--------------------|
| WoS                                                                |                    | Scopus                                                                          |                    |
| Agencies that most fund                                            | Number of Articles | Agencies that most fund                                                         | Number of Articles |
| National Natural Science Foundation Of China Nsfc                  | 110                | National Natural Science Foundation Of China Nsfc                               | 123                |
| Spanish Government                                                 | 64                 | Fundação para a Ciência e a Tecnologia                                          | 42                 |
| European Commission                                                | 44                 | European Regional Development Fund                                              | 30                 |
| Fundacao Para A Ciencia E A Tecnologia Fct                         | 44                 | Horizon 2020 Framework Programme                                                | 29                 |
| Canadian Institutes Of Health Research Cihr                        | 37                 | Consejo Nacional de Investigaciones Científicas y Técnicas                      | 27                 |
| Consejo Nacional De Investigaciones Cientificas Y Tecnicas Conicet | 27                 | European Commission                                                             | 26                 |
| Cystic Fibrosis Canada                                             | 23                 | Ministerio de Ciencia, Innovación y Universidades                               | 23                 |
| Conselho Nacional De Desenvolvimento Cientifico E Tecnológico Cnpq | 22                 | National Key Research and Development Program of China                          | 23                 |
| Coordenacao De Aperfeicoamento De Pessoal De Nivel Superior Capes  | 20                 | Universidad Nacional de Cuyo                                                    | 23                 |
| National Key R D Program Of China                                  | 18                 | Coordenação de Aperfeiçoamento de Pessoal de Nível Superior                     | 22                 |
| Natural Sciences And Engineering Research Council Of Canada Nserc  | 18                 | Conselho Nacional de Desenvolvimento Científico e Tecnológico                   | 21                 |
| Fundacao De Amparo A Pesquisa Do Estado De Sao Paulo Fapesp        | 16                 | Ministério da Ciência, Tecnologia e Ensino Superior                             | 19                 |
| Natural Science Foundation Of Zhejiang Province                    | 15                 | Fundação de Amparo à Pesquisa do Estado de São Paulo                            | 17                 |
| European Research Council Erc                                      | 14                 | Department of Science and Technology, Ministry of Science and Technology, India | 16                 |
| Cgiar                                                              | 13                 | European Research Council                                                       | 16                 |
| Department Of Science Technology India                             | 13                 | Hrvatska Zaklada za Znanost                                                     | 16                 |
| National Institutes Of Health Nih Usa                              | 13                 | Natural Science Foundation of Zhejiang Province                                 | 16                 |
| United States Department Of Health Human Services                  | 13                 | Ministarstvo Prosvete, Nauke i Tehnološkog Razvoja                              | 15                 |
| Croatian Science Foundation                                        | 12                 | Ministry of Higher Education, Malaysia                                          | 15                 |

Facultad De Ciencias Agrarias Universidad Nacional De  
Cuyo Mendoza Argentina

12

Universitas Indonesia

15

OBS.: The major funding agencies become important for those seeking partnership and continuity in extensive research in the area.

**Table S10.** Areas that Publish the Most on the Topic

| <b>S10. Areas that Publish the Most on the Topic</b> |                           |                                              |                           |
|------------------------------------------------------|---------------------------|----------------------------------------------|---------------------------|
| <b>WoS</b>                                           |                           | <b>Scopus</b>                                |                           |
| <b>Research Areas</b>                                | <b>Number of Articles</b> | <b>Research Areas</b>                        | <b>Number of Articles</b> |
| Chemistry                                            | 538                       | Chemistry                                    | 554                       |
| Biochemistry Molecular Biology                       | 176                       | Chemical Engineering                         | 287                       |
| Engineering                                          | 173                       | Agricultural and Biological Sciences         | 248                       |
| Food Science Technology                              | 166                       | Biochemistry, Genetics and Molecular Biology | 239                       |
| Science Technology Other Topics                      | 122                       | Environmental Science                        | 188                       |
| Physics                                              | 95                        | Materials Science                            | 166                       |
| Pharmacology Pharmacy                                | 81                        | Pharmacology, Toxicology and Pharmaceutics   | 145                       |
| Plant Sciences                                       | 61                        | Physics and Astronomy                        | 134                       |
| Environmental Sciences Ecology                       | 52                        | Engineering                                  | 100                       |
| Biotechnology Applied Microbiology                   | 46                        | Energy                                       | 91                        |
| Nutrition Dietetics                                  | 43                        | Medicine                                     | 65                        |
| Agriculture                                          | 38                        | Immunology and Microbiology                  | 41                        |
| Materials Science                                    | 32                        | Multidisciplinary                            | 18                        |
| Polymer Science                                      | 32                        | Social Sciences                              | 18                        |
| Immunology                                           | 30                        | Computer Science                             | 15                        |
| Energy Fuels                                         | 22                        | Health Professions                           | 15                        |
| Integrative Complementary Medicine                   | 18                        | Business, Management and Accounting          | 12                        |
| Cell Biology                                         | 13                        | Economics, Econometrics and Finance          | 8                         |
| Thermodynamics                                       | 13                        | Earth and Planetary Sciences                 | 6                         |
| Spectroscopy                                         | 12                        | Mathematics                                  | 6                         |

OBS.: This analysis helps direct research on the topic of interest, aimed at those who already have extensive research in the area and even those who may become potential areas of coverage for the topic.

**Table S11.** Most cited articles when complementing the search with the terms "Low Transition Temperature Mixtures", "LTTMs" and "Deep Eutectic Solvents"

| Authors                                                                                          | Article Name                                                                                                                                                                                                                                                    | Journal Information                                             |
|--------------------------------------------------------------------------------------------------|-----------------------------------------------------------------------------------------------------------------------------------------------------------------------------------------------------------------------------------------------------------------|-----------------------------------------------------------------|
| Abbott, A. P., Harris, R. C., Ryder, K. S., D'Agostino, C., Gladden, L. F., & Mantle, M. D.      | Glycerol eutectics as sustainable solvent systems                                                                                                                                                                                                               | Green Chemistry. 2011;13(1), 82-90                              |
| Alvarez-Vasco, C., Ma, R., Quintero, M., Guo, M., Geleynse, S., Ramasamy, K. K., ... & Zhang, X. | Unique low-molecular-weight lignin with high purity extracted from wood by deep eutectic solvents (DES): a source of lignin for valorization                                                                                                                    | Green chemistry. 2016;18(19), 5133-5141                         |
| Carriazo, D., Serrano, M. C., Gutiérrez, M. C., Ferrer, M. L., & del Monte, F.                   | Deep-eutectic solvents playing multiple roles in the synthesis of polymers and related materials                                                                                                                                                                | Chemical Society Reviews. 2012;41(14), 4996-5014                |
| Durand, E., Lecomte, J., & Villeneuve, P.                                                        | From green chemistry to nature: The versatile role of low transition temperature mixtures                                                                                                                                                                       | Biochimie. 2016;120, 119-123                                    |
| El Achkar T., Fourmentin S., Greige-Gerges H.                                                    | Deep eutectic solvents: An overview on their interactions with water and biochemical compounds                                                                                                                                                                  | Journal of Molecular Liquids. 2019;288:111028                   |
| Florindo, C., Oliveira, F. S., Rebelo, L. P. N., Fernandes, A. M., & Marrucho, I. M.             | Insights into the synthesis and properties of deep eutectic solvents based on cholinium chloride and carboxylic acids                                                                                                                                           | ACS Sustainable Chemistry & Engineering. 2014;2(10), 2416-2425  |
| Francisco M., González A. S., de Dios S. L. G., Weggemans W., Kroon M. C.                        | Comparison of a low transition temperature mixture (LTTM) formed by lactic acid and choline chloride with choline lactate ionic liquid and the choline chloride salt: physical properties and vapour-liquid equilibria of mixtures containing water and ethanol | RSC advances. 2013;3(45):23553-61                               |
| Francisco M., van den Bruinhorst A., Zubeir L. F., Peters C. J., Kroon M. C.                     | A new low transition temperature mixture (LTTM) formed by choline chloride+ lactic acid: Characterization as solvent for CO2 capture                                                                                                                            | Fluid Phase Equilibria. 2013;340:77-84                          |
| Francisco, M., Van Den Bruinhorst, A., & Kroon, M. C.                                            | New natural and renewable low transition temperature mixtures (LTTMs): screening as solvents for lignocellulosic biomass processing                                                                                                                             | Green chemistry. 2012;14(8), 2153-2157                          |
| Francisco, M., van den Bruinhorst, A., & Kroon, M. C.                                            | Low-transition-temperature mixtures (LTTMs): A new generation of designer solvents                                                                                                                                                                              | Angewandte Chemie international edition. 2013;52(11), 3074-3085 |

|                                                                                                                                                                                                |                                                                                                                                                                                                         |                                                                                                                                                                                                                                     |
|------------------------------------------------------------------------------------------------------------------------------------------------------------------------------------------------|---------------------------------------------------------------------------------------------------------------------------------------------------------------------------------------------------------|-------------------------------------------------------------------------------------------------------------------------------------------------------------------------------------------------------------------------------------|
| García G., Aparicio S., Ullah R.,<br>Atilhan M.                                                                                                                                                | Deep eutectic solvents: physicochemical properties and gas separation applications                                                                                                                      | Energy & Fuels.<br>2015;29(4):2616–44<br>Trends in biotechnology.<br>1994;12(4):118–22                                                                                                                                              |
| Gill I., Vulfson E.<br>Gonzalez, A. S., Francisco, M.,<br>Jimeno, G., de Dios, S. L. G., &<br>Kroon, M. C.                                                                                     | Enzymic catalysis in heterogeneous eutectic mixtures of substrates                                                                                                                                      | Fluid Phase Equilibria.<br>2013;360, 54-62<br>Chemical reviews.<br>2020;121(3):1232–85                                                                                                                                              |
| Hansen B. B., Spittle S., Chen B., Poe<br>D., Zhang Y., Klein J. M., et al.<br>Hou, X. D., Li, A. L., Lin, K. P.,<br>Wang, Y. Y., Kuang, Z. Y., & Cao, S.<br>L.                                | Liquid–liquid equilibrium data for the systems {LTTM+ benzene+ hexane} and {LTTM+ ethyl acetate+ hexane} at different temperatures and atmospheric pressure                                             |                                                                                                                                                                                                                                     |
| Hussin, S. A. M., Varanusupakul, P.,<br>Shahabuddin, S., Hui, B. Y., &<br>Mohamad, S.                                                                                                          | Deep eutectic solvents: A review of fundamentals and applications                                                                                                                                       | Bioresource technology.<br>2018;249, 261-267                                                                                                                                                                                        |
|                                                                                                                                                                                                | Insight into the structure-function relationships of deep eutectic solvents during rice straw pretreatment                                                                                              |                                                                                                                                                                                                                                     |
|                                                                                                                                                                                                | Synthesis and characterization of green menthol-based low transition temperature mixture with tunable thermophysical properties as hydrophobic low viscosity solvent                                    | Journal of Molecular<br>Liquids. 2020;308, 113015<br>Journal of applied<br>research on medicinal and<br>aromatic plants. 2017;6,<br>31-40<br>Green Chemistry.<br>2013;15(10), 2793-2799<br>RSC advances. 2015;5(60),<br>48675-48704 |
| Jancheva, M., Grigorakis, S.,<br>Loupassaki, S., & Makris, D. P.<br>Li, C., Li, D., Zou, S., Li, Z., Yin, J.,<br>Wang, A., ... & Zhao, Q.<br>Liu, P., Hao, J. W., Mo, L. P., &<br>Zhang, Z. H. | Optimised extraction of antioxidant polyphenols from <i>Satureja thymbra</i> using newly designed glycerol-based natural low-transition temperature mixtures (LTTMs)                                    |                                                                                                                                                                                                                                     |
|                                                                                                                                                                                                | Extraction desulfurization process of fuels with ammonium-based deep eutectic solvents                                                                                                                  |                                                                                                                                                                                                                                     |
|                                                                                                                                                                                                | Recent advances in the application of deep eutectic solvents as sustainable media as well as catalysts in organic reactions                                                                             |                                                                                                                                                                                                                                     |
|                                                                                                                                                                                                | Extraction of antioxidant phenolics from agri-food waste biomass using a newly designed glycerol-based natural low-transition temperature mixture: A comparison with conventional eco-friendly solvents | Recycling. 2016;1(1), 194-204.<br>Journal of Solution<br>Chemistry. 2019;48, 962-982                                                                                                                                                |
| Manousaki, A., Jancheva, M.,<br>Grigorakis, S., & Makris, D. P.                                                                                                                                |                                                                                                                                                                                                         |                                                                                                                                                                                                                                     |
| Martins, M. A., Pinho, S. P., &<br>Coutinho, J. A.                                                                                                                                             | Insights into the nature of eutectic and deep eutectic mixtures                                                                                                                                         |                                                                                                                                                                                                                                     |
| Mota-Morales, J. D., Sánchez-Leija, R.<br>J., Carranza, A., Pojman, J. A., del<br>Monte, F., & Luna-Bárcenas, G.                                                                               | Free-radical polymerizations of and in deep eutectic solvents: Green synthesis of functional materials                                                                                                  | Progress in Polymer<br>Science. 2018;78, 139-153                                                                                                                                                                                    |

|                                                                                                                                                                     |                                                                                                                                                                                                                                                                                                                                                                    |                                                                                                                                                                                                                                                                                                                                                                                                                                                                                                                                                                                                                                                                                             |
|---------------------------------------------------------------------------------------------------------------------------------------------------------------------|--------------------------------------------------------------------------------------------------------------------------------------------------------------------------------------------------------------------------------------------------------------------------------------------------------------------------------------------------------------------|---------------------------------------------------------------------------------------------------------------------------------------------------------------------------------------------------------------------------------------------------------------------------------------------------------------------------------------------------------------------------------------------------------------------------------------------------------------------------------------------------------------------------------------------------------------------------------------------------------------------------------------------------------------------------------------------|
| Passos H., Tavares D. J., Ferreira A. M., Freire M. G., Coutinho J. A. Rodriguez N. R., Molina B. S., Kroon M. C.                                                   | Are aqueous biphasic systems composed of deep eutectic solvents ternary or quaternary systems?<br>Aliphatic+ ethanol separation via liquid–liquid extraction using low transition temperature mixtures as extracting agents<br>Isopropanol dehydration via extractive distillation using low transition temperature mixtures as entrainers                         | ACS Sustainable Chemistry & Engineering. 2016;4(5):2881–6<br>Fluid Phase Equilibria. 2015;394:71–82<br>The Journal of Chemical Thermodynamics. 2015;85, 216–221<br>Fluid Phase Equilibria. 2015;385, 72–78<br>Green Chemistry. 2012;14(11), 2969–2982<br>Green Chemistry. 2017;19(1), 18–43<br>Analytical and bioanalytical chemistry. 2018;410, 3705–3713<br>Chemical Society Reviews. 2012;41(10), 4030–4066<br>ChemSusChem. 2017;10(13), 2696–2706<br>Green Chemistry. 2016;18(17), 4616–4622<br>Biotechnology for biofuels. 2017;10:1–10<br><br>Green Chemistry. 2015;17(9), 4518–4521<br>Accounts of chemical research. 2014;47(8):2299–308<br>Bioresource technology. 2016;199:258–64 |
| Rodriguez, N. R., & Kroon, M. C.<br>Rodríguez, N. R., González, A. S., Tijssen, P. M., & Kroon, M. C.                                                               | Low transition temperature mixtures (LTTMs) as novel entrainers in extractive distillation                                                                                                                                                                                                                                                                         |                                                                                                                                                                                                                                                                                                                                                                                                                                                                                                                                                                                                                                                                                             |
| Ruß, C., & König, B.                                                                                                                                                | Low melting mixtures in organic synthesis—an alternative to ionic liquids?                                                                                                                                                                                                                                                                                         |                                                                                                                                                                                                                                                                                                                                                                                                                                                                                                                                                                                                                                                                                             |
| Sheldon, R. A.                                                                                                                                                      | The E factor 25 years on: the rise of green chemistry and sustainability                                                                                                                                                                                                                                                                                           |                                                                                                                                                                                                                                                                                                                                                                                                                                                                                                                                                                                                                                                                                             |
| Sutton, A. T., Fraige, K., Leme, G. M., da Silva Bolzani, V., Hilder, E. F., Cavalheiro, A. J., ... & Funari, C. S.                                                 | Natural deep eutectic solvents as the major mobile phase components in high-performance liquid chromatography—searching for alternatives to organic solvents                                                                                                                                                                                                       |                                                                                                                                                                                                                                                                                                                                                                                                                                                                                                                                                                                                                                                                                             |
| Tang, S., Baker, G. A., & Zhao, H.<br>Tang, X., Zuo, M., Li, Z., Liu, H., Xiong, C., Zeng, X., ... & Lin, L.<br>Tereshatov, E. E., Boltoeva, M. Y., & Folden, C. M. | Ether-and alcohol-functionalized task-specific ionic liquids: attractive properties and applications<br>Green processing of lignocellulosic biomass and its derivatives in deep eutectic solvents<br>First evidence of metal transfer into hydrophobic deep eutectic and low-transition-temperature mixtures: indium extraction from hydrochloric and oxalic acids |                                                                                                                                                                                                                                                                                                                                                                                                                                                                                                                                                                                                                                                                                             |
| Tian D., Chandra R. P., Lee J. S., Lu C., Saddler J. N.                                                                                                             | A comparison of various lignin-extraction methods to enhance the accessibility and ease of enzymatic hydrolysis of the cellulosic component of steam-pretreated poplar                                                                                                                                                                                             |                                                                                                                                                                                                                                                                                                                                                                                                                                                                                                                                                                                                                                                                                             |
| van Osch, D. J., Zubeir, L. F., van den Bruinhorst, A., Rocha, M. A., & Kroon, M. C.                                                                                | Hydrophobic deep eutectic solvents as water-immiscible extractants                                                                                                                                                                                                                                                                                                 |                                                                                                                                                                                                                                                                                                                                                                                                                                                                                                                                                                                                                                                                                             |
| Wagle D. V., Zhao H., Baker G. A.<br>Yiin C. L., Quitain A. T., Yusup S., Sasaki M., Uemura Y., Kida T.                                                             | Deep eutectic solvents: sustainable media for nanoscale and functional materials<br>Characterization of natural low transition temperature mixtures (LTTMs): Green solvents for biomass delignification                                                                                                                                                            |                                                                                                                                                                                                                                                                                                                                                                                                                                                                                                                                                                                                                                                                                             |

---

|                                                                            |                                                                                                                                                                          |                                                                                        |
|----------------------------------------------------------------------------|--------------------------------------------------------------------------------------------------------------------------------------------------------------------------|----------------------------------------------------------------------------------------|
| Yiin, C. L., Quitain, A. T., Yusup, S., Uemura, Y., Sasaki, M., & Kida, T. | Sustainable green pretreatment approach to biomass-to-energy conversion using natural hydro-low-transition-temperature mixtures                                          | Bioresource technology. 2018;261, 361-369                                              |
| Yiin, C. L., Yusup, S., Quitain, A. T., Uemura, Y., Sasaki, M., & Kida, T. | Thermogravimetric analysis and kinetic modeling of low-transition-temperature mixtures pretreated oil palm empty fruit bunch for possible maximum yield of pyrolysis oil | Bioresource technology. 2018;255, 189-197                                              |
| Yin J., Wang J., Li Z., Li D., Yang G., Cui Y., et al.                     | Deep desulfurization of fuels based on an oxidation/extraction process with acidic deep eutectic solvents                                                                | Green Chemistry. 2015;17(9):4552–9<br>Chemical Society Reviews. 2021;50(15), 8596-8638 |
| Yu, D., Xue, Z., & Mu, T.                                                  | Eutectics: formation, properties, and applications                                                                                                                       | The Journal of Physical Chemistry B. 2014;118(49), 14429-14441                         |
| Zubeir, L. F., Lacroix, M. H., & Kroon, M. C.                              | Low transition temperature mixtures as innovative and sustainable CO2 capture solvents                                                                                   |                                                                                        |

---
